# Supplementary material for: Opposed Effects of Dityrosine Formation in Soluble and Aggregated α-Synuclein on Fibril Growth
Source: PubMed Central journal article supplement (PMC5637163; doi:10.1016/j.jmb.2017.09.005), 2017-10-13
Supplement: mmc1.pdf [file mmc1.pdf]

# Supporting Information

## **Opposed Effects of Dityrosine Formation in Soluble and Aggregated $\alpha$ -Synuclein on Fibril Growth**

Michael M. Wördehoff<sup>1</sup>, Hamed Shaykhalishahi<sup>1</sup>, Luca Groß<sup>1</sup>, Lothar Gremer<sup>1,2</sup>, Matthias Stoldt<sup>1,2</sup>, Alexander K. Buell<sup>1</sup>, Dieter Willbold<sup>1,2</sup> and Wolfgang Hoyer<sup>1,2,\*</sup>

<sup>1</sup> Institut für Physikalische Biologie, Heinrich-Heine-Universität Düsseldorf, 40204 Düsseldorf, Germany.

<sup>2</sup> Institute of Complex Systems (ICS-6), Structural Biochemistry, Forschungszentrum Jülich, 52425 Jülich, Germany.

\* Email: wolfgang.hoyer@uni-duesseldorf.de

**Contents: Supplementary Figures S1, S2, S3, S4 and Supplementary Tables S1 and S2.**

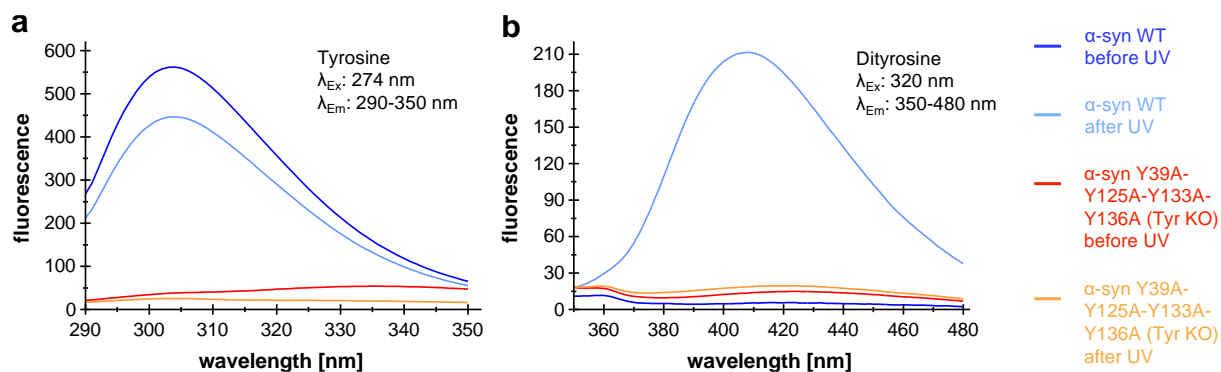

**Figure S1. Tyrosine and dityrosine spectra of  $\alpha$ -syn WT and  $\alpha$ -syn Y39A-Y125A-Y133A-Y136A (Tyr KO) mutant before and after UV-irradiation.** (a) Tyrosine spectra of WT and Tyr KO mutant before and after UV-irradiation recorded at  $\lambda_{Ex}$ : 274 nm and at  $\lambda_{Em}$ : 290-350 nm. Whereas  $\alpha$ -syn WT shows a marked tyrosine spectrum with a peak at 303 nm that decreases  $\sim$ 20% after UV-irradiation, the Tyr KO mutant does not exhibit a marked tyrosine spectrum. (b) Dityrosine spectra of WT and Tyr KO mutant before and after UV-irradiation recorded at  $\lambda_{Ex}$ : 320 nm and at  $\lambda_{Em}$ : 290-350 nm.  $\alpha$ -Syn WT shows a high DiY fluorescence increase at 410 nm after UV-irradiation, the Tyr KO mutant does not show a peak at 410 nm after UV irradiation.

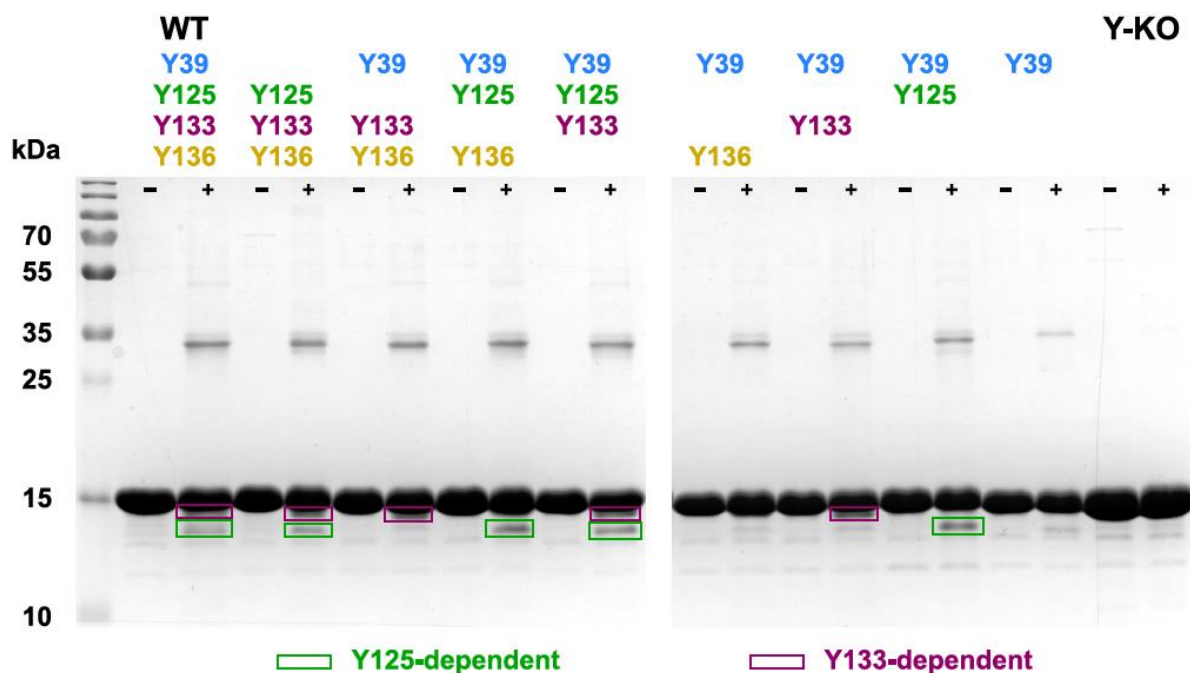

**Figure S2. Low molecular weight bands in SDS-PAGE indicate tyrosine-dependent UV-induced fragmentation of  $\alpha$ -syn.** SDS-PAGE of WT  $\alpha$ -syn and Y-to-A mutants before (-) and after (+) UV irradiation, same gels as in Fig. 1e. Upon UV-irradiation, additional bands appear below the monomer bands of the 140 amino acid monomeric proteins. The two most intense lower MW bands are only observed for constructs containing Tyr-125 (green) or Tyr-133 (purple), respectively, and are not dependent on the presence or absence of any other specific tyrosine residue. This indicates that the bands originate from tyrosine-dependent UV-induced fragmentation and do not represent full-length monomers containing specific intramolecular DiY-crosslinks with distinct migration behavior. Tyrosine-mediated backbone cleavage upon UV exposure of polypeptides has been reported before [1,2].

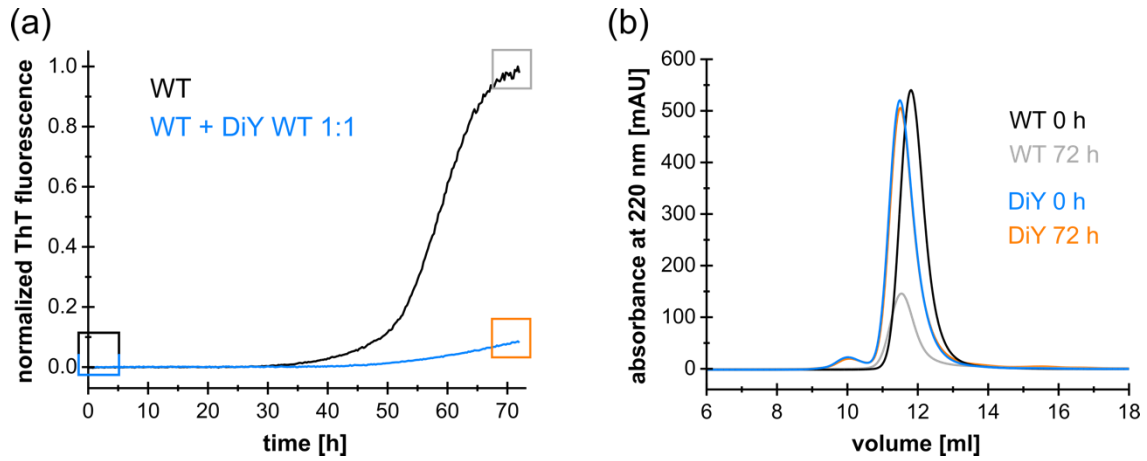

**Figure S3. Analysis of aggregated samples of  $\alpha$ -syn WT and DiY  $\alpha$ -syn WT by size exclusion chromatography (SEC).** (a) 25  $\mu$ M  $\alpha$ -syn WT was aggregated in the presence of 25  $\mu$ M  $\alpha$ -syn WT or 25  $\mu$ M DiY  $\alpha$ -syn WT and 10  $\mu$ M Thioflavin T in 25 mM K-phosphate buffer pH 7.3, 100 mM KCl and 0.05% NaN<sub>3</sub>. Mean of triplicate measurements, normalized to the highest WT fluorescence are shown. At 0 h and after 72 h of aggregation, samples were recovered from the aggregation assay, pooled and centrifuged at 20,000 g and RT for 30 min. Approximately 450  $\mu$ l of the supernatants were loaded onto a Superdex 75 10/300 SEC column (b). SEC analysis revealed that in the case of  $\alpha$ -syn WT, only ~30% of protein is left monomeric after 72 h of aggregation (black vs. grey curve). In the case of  $\alpha$ -syn WT + DiY  $\alpha$ -syn WT (1:1), nearly all protein is still monomeric (and dimeric) after 72 h of aggregation (blue vs. orange curve). No higher molecular weight oligomers could be detected.

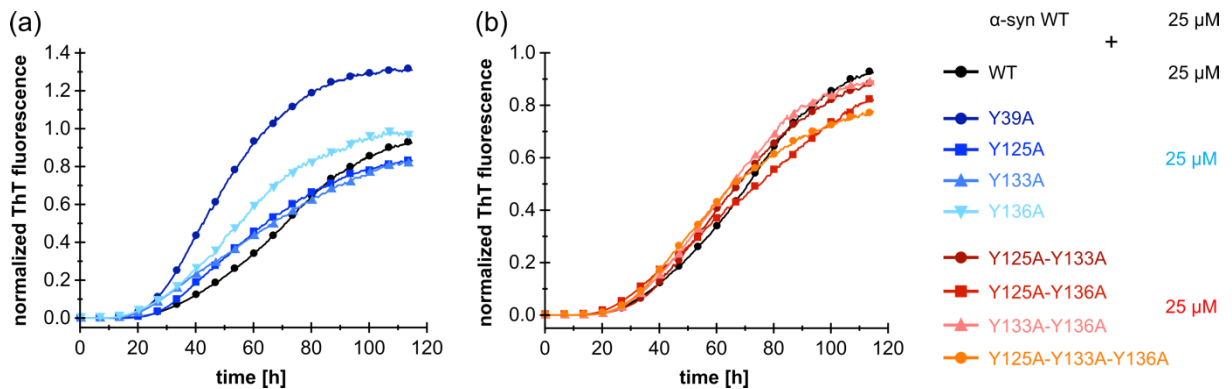

**Figure S4. Aggregation of  $\alpha$ -syn WT in presence of non-irradiated  $\alpha$ -syn Y-to-A mutants.** Analogous to the aggregation assays shown in figure 3, 25  $\mu$ M  $\alpha$ -syn WT was mixed with 25  $\mu$ M of non-irradiated  $\alpha$ -syn single Y-to-A mutants (a) and non-irradiated  $\alpha$ -syn double/triple Y-to-A mutants (b) and aggregated for 120 hours in the presence of 10  $\mu$ M Thioflavin T in 25 mM K-phosphate buffer pH 7.3, 100 mM KCl and 1 mM MgCl<sub>2</sub>. Mean of triplicates normalized to the highest Thioflavin T fluorescence of  $\alpha$ -syn WT is shown. The mean curve for  $\alpha$ -syn WT is based on 12 measurements. Non-irradiated Y-to-A mutants did not inhibit the aggregation of  $\alpha$ -syn WT.

**Table S1. Tyrosine and DiY fluorescence emission of  $\alpha$ -syn variants before and after DiY formation.** For the quadruple mutant, tyrosine and dityrosine spectra could not be measured properly because of the absence of tyrosines, n. o.: not observed.

| Protein                         | Tyrosine fluorescence<br>$\lambda_{Ex}$ : 274 nm, $\lambda_{Em}$ : 303 nm |       |              | Dityrosine fluorescence<br>$\lambda_{Ex}$ : 320 nm, $\lambda_{Em}$ : 410 nm |       |
|---------------------------------|---------------------------------------------------------------------------|-------|--------------|-----------------------------------------------------------------------------|-------|
|                                 | absolute                                                                  |       | decrease [%] | absolute                                                                    |       |
|                                 | before                                                                    | after |              | before                                                                      | after |
| WT                              | 560                                                                       | 451   | 19.5         | 13                                                                          | 356   |
| Y39A                            | 376                                                                       | 288   | 23.3         | 6                                                                           | 109   |
| Y125A                           | 453                                                                       | 378   | 16.7         | 7                                                                           | 138   |
| Y133A                           | 514                                                                       | 410   | 20.2         | 9                                                                           | 136   |
| Y136A                           | 465                                                                       | 367   | 21.0         | 12                                                                          | 215   |
| Y125A-Y133A                     | 399                                                                       | 329   | 17.4         | 9                                                                           | 146   |
| Y125A-Y136A                     | 340                                                                       | 279   | 18.1         | 11                                                                          | 108   |
| Y133A-Y136A                     | 395                                                                       | 320   | 18.9         | 10                                                                          | 134   |
| Y125A-Y133A-Y136A               | 243                                                                       | 176   | 27.6         | 5                                                                           | 27    |
| Y39A-Y125A-Y133A-Y136A (Tyr KO) | n. o.                                                                     | n. o. | -            | n. o.                                                                       | n. o. |

**Table S2. Rate constants of DiY formation in  $\alpha$ -syn.** The kinetics data of WT  $\alpha$ -syn was fit to a first-order reaction, while all other data was fit to a consecutive two stage reaction  $A \xrightarrow{k_1} B \xrightarrow{k_2} C$ .

| Protein           | Rate constants           |                          |
|-------------------|--------------------------|--------------------------|
|                   | $k_m$ [s <sup>-1</sup> ] | $k_n$ [s <sup>-1</sup> ] |
| WT                | $4.02 \cdot 10^{-3}$     | -                        |
| Y39A              | $4.58 \cdot 10^{-3}$     | $4.58 \cdot 10^{-3}$     |
| Y125A             | $1.01 \cdot 10^{-2}$     | $2.95 \cdot 10^{-3}$     |
| Y133A             | $7.75 \cdot 10^{-3}$     | $3.09 \cdot 10^{-3}$     |
| Y136A             | $2.01 \cdot 10^{-2}$     | $3.34 \cdot 10^{-3}$     |
| Y125A-Y133A       | $1.23 \cdot 10^{-2}$     | $3.77 \cdot 10^{-3}$     |
| Y125A-Y136A       | $1.40 \cdot 10^{-2}$     | $3.82 \cdot 10^{-3}$     |
| Y133A-Y136A       | $2.38 \cdot 10^{-2}$     | $3.77 \cdot 10^{-3}$     |
| Y125A-Y133A-Y136A | $5.33 \cdot 10^{-3}$     | $1.33 \cdot 10^{-3}$     |

## References

- [1] D.I. Pattison, M.J. Davies, Actions of ultraviolet light on cellular structures., EXS. (2006) 131–157. doi:10.1007/3-7643-7378-4\_6.
- [2] A. Wright, W.A. Bubb, C.L. Hawkins, M.J. Davies, Singlet oxygen-mediated protein oxidation: evidence for the formation of reactive side chain peroxides on tyrosine residues, Photochem Photobiol. 76 (2002) 35–46. doi:10.1562/0031-8655(2002)0760035SOMPOE2.0.CO2.
